1 **Comparative Analysis of Gene Expression Identifies Distinct Molecular Signatures of Bone**  
2 **Marrow- and Periosteal-Skeletal Stem/Progenitor Cells**

3

4 Lorenzo Deveza<sup>1</sup>, Laura Ortinau<sup>2</sup>, Kevin Lei<sup>2</sup>, Dongsu Park<sup>2\*</sup>

5

6 <sup>1</sup> Department of Orthopaedic Surgery, Baylor College of Medicine, Houston, Texas, United  
7 States of America, <sup>2</sup> Department of Molecular and Human Genetics, Baylor College of Medicine,  
8 One Baylor Plaza, Houston, TX, 77030, USA.

9

10 \* Corresponding author

11 E-mail: [dongsup@bcm.edu](mailto:dongsup@bcm.edu)

## 12 **Abstract**

13 Periosteum and bone marrow (BM) both contain skeletal stem/progenitor cells (SSCs) that  
14 participate in fracture repair. However, the functional difference and selective regulatory  
15 mechanisms of SSCs in different location are unknown due to the lack of specific markers. Here,  
16 we report a comprehensive gene expression analysis of bone marrow SSCs (BM-SSCs),  
17 periosteal SSCs (P-SSCs), and more differentiated osteoprogenitors by using reporter mice  
18 expressing Interferon-inducible *Mx1* and *Nestin*<sup>GFP</sup>, previously known SSC markers. We first  
19 defined that the BM-SSCs can be enriched by the combination of *Mx1* and *Nestin*<sup>GFP</sup> expression,  
20 while endogenous P-SSCs can be isolated by positive selection of *Mx1*, CD105 and CD140a  
21 (known SSC markers) combined with the negative selection of CD45, CD31, and *osteocalcin*<sup>GFP</sup>  
22 (a mature osteolineage marker). Comparative gene expression analysis with FACS-sorted BM-  
23 SSCs, P-SSCs, *Osterix*<sup>+</sup> (OSX) preosteoblasts, CD51<sup>+</sup> stroma cells and CD45<sup>+</sup> hematopoietic  
24 cells as controls revealed that BM-SSCs and P-SSCs have high similarity with few potential  
25 differences without statistical significance. We also found that CD51<sup>+</sup> cells are highly  
26 heterogeneous and little overlap with SSCs. This was further supported by the microarray cluster  
27 analysis, and the two populations clustered together. However, when comparing SSC population  
28 to controls, we found several genes that were uniquely upregulated in endogenous SSCs.  
29 Amongst these genes, we found KDR (aka Flk1 or VEGFR2) to be most interesting and  
30 discovered that it is highly and selectively expressed in P-SSCs. This finding suggests that  
31 endogenous P-SSCs are functionally very similar to BM-SSCs with undetectable significant  
32 differences in gene expression but there are distinct molecular signatures in P-SSCs, which can  
33 be useful to specify P-SSC subset *in vivo*.

## 34 **Introduction**

35 Bone fractures constitute a significant burden to the healthcare system with about 16 M  
36 fractures per year in the United States. Majority of fractures heal with adequate treatment, but about  
37 5-10% go on to non-union [1]. Treatment methods include bone grafting, delivery of growth factors,  
38 and cell-based therapies [1,2]. Fundamentally, these attempts to augment the healing process are  
39 attempts to stimulate the cells that drive fracture repair. Studies on such therapeutic attempts are  
40 based on using or stimulating bone marrow skeletal stem/progenitor cells (BM-SSCs), also known  
41 as bone marrow mesenchymal cells (BMSCs) [3]. However, endogenous SSCs are heterogeneous  
42 population and are present in multiple tissue location including periosteum [4]. Despite SSCs are  
43 necessary for fracture repair, yet whether SSCs in different location have same functional properties  
44 or they have distinct function and regulation that are necessary of the repair process remain  
45 unknown.

46 At its core, bone fracture healing is a complex process that involves the interplay of multiple  
47 cell types derived from different tissue sources. Bone marrow (BM) and periosteum are two of the  
48 surrounding tissue intimately involved in fracture repair [5]. However, BM is not necessary for  
49 healing to proceed, while removal of periosteal tissues can cause non-union. Indeed, this is a  
50 fundamental principle in clinical fracture management [6]. This is further exemplified by cell-  
51 labeling studies demonstrating that the major cellular contribution to the fracture callus are  
52 periosteal cells [7]. More importantly, it has been reported that P-SSCs may have differing  
53 functions than BM-SSCs [6,8], whereby P-SSCs display endochondral ossification and  
54 intramembranous bone formation, while BM-SSCs only participate in the latter process [8].  
55 These differences suggest that P-SSCs may have different inherent properties compared to BM-  
56 SSCs.

57           Although there has been extensive studies to define unique gene expression patterns in  
58   postnatal skeletal stem cells [9], to date, there have been no studies looking specifically into the  
59   potential differences between P-SSCs and BM-SSCs. This is partly because no reliable markers  
60   exist to isolate each of these cell populations to enable such study. Studies on mouse BM-SSCs  
61   have identified multiple markers that isolate a potentially more highly purified population of  
62   these cells, including *Nestin<sup>GFP</sup>* [10], *LepR<sup>Cre</sup>* (Leptin Receptor) [11], and *Grem1<sup>Cre-ERT</sup>* (Gremlin  
63   1) [12]. Previously, *Myxovirus resistance 1 (Mx1)* was also shown to identify long-term resident  
64   skeletal stem/progenitor cells in mice via in vivo imaging experiments consistent with their role  
65   as BM-SSCs [13]. While fewer markers exist for P-SSCs, *Mx1<sup>+</sup>* cells are known to reside within  
66   the periosteal compartment [13], and these cells also provide downstream osteolineage cells  
67   enabling their potential use for endogenous P-SSC study.

68           In this study, we isolate BM-SSCs and P-SSCs from transgenic mice based on expression  
69   of *Mx1* promoter. BM-SSCs were isolated from BM tissues in transgenic mice expressing *Mx1<sup>Cre</sup>*  
70   and *Nestin<sup>GFP</sup>* (*Mx1<sup>+</sup>Nes<sup>GFP+</sup>* cells), known SSC markers. P-SSCs were isolated from periosteal  
71   tissues in *Mx1<sup>Cre</sup>*; *ROSA<sup>Tomato</sup>*; *Osteocalcin<sup>GFP</sup>* reporter mice, whereby P-SSCs were negatively  
72   selected against *Osteocalcin<sup>GFP+</sup>* osteoblasts (*Mx1<sup>+</sup>Ocn<sup>-</sup>* cells). Microarray was run on these cell  
73   populations, using CD45<sup>+</sup> cells and Osterix (*Osx<sup>+</sup>*) osteolineage cells as controls. We further  
74   compared CD51<sup>+</sup> cells as an additional BM-SSC population reported in literature. Lastly, we  
75   identify a potentially novel marker for mouse P-SSCs.

76

## 77   **Materials and Methods**

78   **Mice.** Four to six-week old C57BL/6, *Mx1<sup>Cre</sup>* [14], *Rosa26-loxP-stop-loxP-tdTomato (Rosa<sup>Tomato</sup>)*  
79   mice were purchased from The Jackson laboratory. *Osteocalcin<sup>GFP</sup>* [15] and *Nestin<sup>GFP</sup>* [10]

80 (C57/BL6 background) mice were kindly provided by Drs. Henry Kronenberg and Ivo Kalajzic.  
81 Genotyping of all Cre-transgenic mice and the Rosa locus was performed by PCR (GenDEPOT)  
82 according to The Jackson laboratory's protocols. At 4-week age, all *Mx1* mice (*Mx1<sup>Cre</sup>*;  
83 *Rosa<sup>Tomato</sup>*; *Osteocalcin<sup>GFP</sup>* or *Mx1<sup>Cre</sup>*; *Rosa<sup>Tomato</sup>*; *Nestin<sup>GFP</sup>*) were lethally irradiated with 9.5 Gy  
84 and transplanted with 10<sup>6</sup> whole bone marrow cells from wild-type C57BL/6 mice (WT-BMT).  
85 At Six to eight weeks later (when host hematopoietic cells are less than 1%), *Mx1<sup>Cre</sup>* activity was  
86 induced by intraperitoneal injection of 25 mg/kg of pIpC (Sigma) every other day for 10 days as  
87 described previously [10]. At the indicated time after pIpC induction, mice were subjected to in  
88 vivo imaging experiments. All mice were maintained in pathogen-free conditions, and all  
89 procedures were approved by Baylor College of Medicine's Institutional Animal Care and Use  
90 Committee (IACUC).

91  
92 **Intravital imaging.** For *in vivo* imaging of fluorescent cells in living animals, mice were  
93 anesthetized with Combo-III and prepared for a customized two-photon and confocal hybrid  
94 microscope (Leica TCS SP8MP with DM6000CFS) specifically designed for live animal  
95 imaging, as described in our previous report [13,16]. Briefly, a small incision was introduced on  
96 the scalp of *Mx1/Tomato/Ocn-GFP* or *Mx1/Tomato/Nestin-GFP* mice and the surface of calvaria  
97 near the intersection of sagittal and coronal suture was exposed. The mice were then mounted on  
98 a 3-D axis motorized stage (Anaheim Automation Anaheim, CA), and the calvarial surface was  
99 scanned for second harmonic generation (SHG by femto-second titanium:sapphire laser pulses:  
100 880 nm) from bones to identify the injury sites and the intersection of sagittal and coronal sutures.  
101 GFP-expressing cells (488 nm excitation, 505–550 nm detection) and Tomato-expressing cells  
102 (561 nm excitation, 590–620 nm detection) were simultaneously imaged by confocal spectral

103 fluorescence detection. All images were recorded with their distances to the intersection of the  
104 sagittal and coronal sutures to define their precise location. After *in vivo* imaging, the scalp was  
105 closed using a VICRYL plus suture (Ethicon), and post-operative care was provided as  
106 previously described. 3-D Images were reconstructed using the Leica Application Suite software,  
107 and osteoblasts were counted.

108

109 **Isolation and flow cytometry analysis of mouse SSCs.** To isolate periosteal cells, dissected  
110 femurs, tibias, pelvis and calvaria from mice were placed in PBS, and the overlying fascia,  
111 muscle, and tendon were carefully removed. The bones with periosteum were incubated in ice-  
112 cold PBS with 1% FBS for 30 min, and the loosely associated periosteum was peeled off using  
113 forceps, scalpel, and dissecting scissors. The soft floating periosteal tissues collected with a 40-  
114  $\mu\text{m}$  strainer were then incubated with 5–10 ml of 0.1 % collagenase and 10% FBS in PBS at  
115 37°C for 1 hour, and dissociated periosteal cells were washed with PBS, filtered with a 40- $\mu\text{m}$   
116 strainer and resuspended at  $\sim 1 \times 10^7$  cells/ml. To isolate cells from bones and bone marrow,  
117 dissected femurs, tibias and pelvis bones after periosteum removal were cracked with a pestle  
118 and rinsed 3 times to remove and collect bone marrow cells. The remaining bones were minced  
119 with a scalpel and/or a dissecting scissor and then incubated with 10 ml of 0.1 % collagenase and  
120 10% FBS in PBS at 37°C for 1 hour with strong vortexing every 10 minute. Dissociated cells  
121 were washed with PBS, filtered with a 40- $\mu\text{m}$  strainer and resuspended at  $\sim 1 \times 10^7$  cells/ml. To  
122 analyze or isolate SSCs and osteogenic cells, cells were stained with CD105-PE-Cy7 (clone:  
123 MJ7/18), CD140a-APC (clone: APA5), CD45-pacific blue (clone: 30-F11), Ter119-APC-Cy7  
124 (clone: TER-119), and CD31-eFlour 450 (clone: 390) in combination with KDR-PE-Cy7 (clone:  
125 J073E5). Antibodies were purchased from eBioscience unless otherwise stated. Propidium iodide

126 was used for viable cell gating. Flow cytometric experiments and sorting were performed using  
127 the LSRII and FACS Aria cytometer (BD Biosciences, San Jose, CA). Data were analyzed with  
128 the FlowJo software (TreeStar, Ashland, OR) and represented as histograms, contour, or dot plots  
129 of fluorescence intensity.

130 **Microarray analysis.** Sorted cells pooled from five or more male and female mice were used to  
131 isolate RNA using the RNeasy Micro kit (Qiagen), according to the manufacturer's instructions.  
132 Purified RNA was reverse-transcribed, amplified, and labeled with the Affymetrix Gene Chip  
133 whole transcript sense target labeling kit. Labeled cDNA (2 biological repeats) from indicated  
134 cells was analyzed using Affymetrix mouse A430 microarrays, according to the manufacturer's  
135 instructions, performed at the Dana-Farber Cancer Institute Microarray Core. CEL files  
136 (containing raw expression measurements) were imported to Partek GS, and data were  
137 preprocessed and normalized using the RMA (Robust Multichip Average) algorithm.

138  
139 **Microarray data analysis and statistics.** Microarray data was pre-processed for normalization  
140 and statistical differences using R statistical package. Normalization was done using a robust  
141 multichip average (RMA) technique. Statistical differences were calculated with the limma  
142 package in R. Post-processing cluster analysis was done using Cluster 3.0 software and were  
143 plotted using Java TreeView software. Scatter plots were generated using Orange biolab  
144 software. We assessed pairwise comparisons between each of the following groups: 1)  
145  $MxI^+Ocn^-$  P-SSCs; 2)  $MxI^+Nes^+$  BM-SSCs; 3)  $CD45^+$  hematopoietic lineage cells; 4)  
146  $Osterix^{GFP+}$  osteoprogenitor cells [17]; and, 5)  $CD51^+$  BMSCs [18]. We evaluated the number of  
147 statistically different genes by changing the p-value statistical criteria for acceptance. We found

148 that acceptance criteria of  $p < 0.05$  provided at least 50 statistically different genes between  
149 controls and  $MxI^+$  SSCs.

## 150 **Results**

### 151 ***In vivo* identification of BM-SSCs and P-SSCs**

152 BM-SSCs and P-SSCs were derived from transgenic mice based on expression of  
153 interferon-induced GTP-Binding Protein *MxI* promoter, which had been previously shown to  
154 represent long-term resident lineage restricted osteoprogenitor cells [13]. Here,  $MxI^{Cre}$ ;  
155  $Rosa^{Tomato}$ ;  $Osteocalcin^{GFP}$  mice were used as previously described [16]. Using this model, we  
156 confirmed through pulse-chase labeling studies in native bone marrow tissue (i.e. no injury) that  
157 pulse-labeled  $MxI^+$  cells at day 5 are mainly  $Osteocalcin^{GFP}$  negative ( $Ocn^-$ ) and these  $MxI^+$   
158 cells contribute to the majority of new  $Ocn^+$  osteoblasts at day 60 (yellow), demonstrating that  
159  $MxI^+$  cells include skeletal stem/progenitor cells (SSCs), albeit far upstream of mature  
160 osteoblasts (Fig. 1A). Considering that  $Ocn^+$  cells represent mature osteolineage cells, we found  
161 that  $MxI^+Ocn^-$  upstream progenitors are present throughout bone marrow, as well as calvarial  
162 suture and periosteum (Fig. 1B). We thus isolated P-SSCs from periosteal tissue by focusing on  
163  $MxI^+Ocn^-$  cells within this tissue compartment. Specifically, we isolated P-SSCs by isolating  
164 cells from periosteum, negatively selecting for hematopoietic lineage cells ( $CD45^-$ ), endothelial  
165 lineage cells ( $CD31^-$ ), erythroid lineage ( $Ter119^-$ ), and adult osteolineage cells ( $Ocn^-$ ), and  
166 positively selecting for SSC markers including  $MxI^+$ ,  $CD105^+$  and  $CD140a^+$  (PDGFR $\alpha$ ). We  
167 refer to these cells as  $MxI^+Ocn^-$  P-SSCs.

168 BM-SSCs were isolated from  $MxI^{Cre}$ ;  $Rosa26^{Tomato}$ ;  $Nestin^{GFP}$  transgenic mice.  $Nestin^{GFP}$   
169 ( $Nes^+$ ) is a well-studied marker for BM-SSCs [10]. By pulse-chase labeling studies, we found  
170 that  $MxI^+Nes^+$  cells are native perivascular cells that are present throughout BM and calvarial



171 suture (Fig. 1D), which is consistent with prior studies as BM-SSCs are generally known to be  
172 perivascular cells [10,19]. For our experiments, we isolate BM-SSCs using this model from the  
173 BM tissue compartment, which are sorted by negative selection of CD45, CD31, Ter119, as well  
174 as positive selection of CD105, CD140a (PDGFRa); finally,  $Mxl^+Nes^+$  cells are selected from  
175 the remaining cells (Fig. 1E). We refer to this subpopulation as  $Mxl^+Nes^+$  BM-SSCs.  
176 Interestingly, we noted that the selection of BM-SSCs based on  $CD45^-CD31^-Ter119^-CD105^+$   
177  $CD140a^+$  cells yields a heterogeneous mixture of  $Mxl^+$  and  $Nestin^+$  cells (Fig. 1E).

### 178 **Common selection criteria for BM-SSCs yields a heterogeneous mixture**

179 Microarray analysis was next performed on  $Mxl^+Ocn^-$  P-SSCs and  $Mxl^+Nes^+$  BM-SSCs  
180 to assess for functional genetic differences. We added an additional BM-SSC population that was  
181 selected from the BM compartment based on  $CD45^-CD31^-Ter119^-CD105^+CD140a^+$  selection,  
182 in addition to  $CD51^+$ , which is a commonly used selection criteria for BMSCs [18]. We refer to  
183 these cells as  $CD51^+$  BMSCs.  $CD45^+$  hematopoietic lineage cells and  $Osterix^+$  ( $Osx^{GFP^+}$ ) [17,20]  
184 osteoprogenitor cells were used as control populations. From scatter plot analysis of all  
185 microarrayed genes, we found that each SSC population is a distinct population as compared to  
186  $CD45^+$  cells (Fig. 2A-C). We further found that each SSC population are similarly more closely  
187 related to  $Osx^+$  osteolineage cells, but with multiple differentially expressed genes (Fig. 2D-F).  
188 Taken together, these scatter plots illustrated that each SSC population is similarly distinct from  
189  $CD45^+$  and  $Osx^+$  cells.

190 Interestingly, we found that commonly used selection criteria for BMSCs may yield a  
191 heterogeneous mixture of cells, which is demonstrated by direct comparison between  $Mxl^+Nes^+$   
192 BM-SSCs and  $CD51^+$  BMSCs (Fig. 2G). Between these two cell populations there were 97  
193 differentially expressed genes at  $p < 0.01$  and 430 differentially expressed genes at  $p < 0.05$ .

194 When comparing  $MxI^+Nes^+$  BM-SSCs with  $Nes^+$  BMSCs (i.e.  $MxI^{+/-}$ ) there were no  
195 differentially expressed genes (Fig. 2H). These findings suggest that although both  $Nes^+$  and  
196  $CD140a^+CD51^+$  have both been shown to represent BMSCs, that BMSCs are a heterogeneous  
197 mixture of cells.

### 198 **P-SSCs and BM-SSCs are a similar population of cells**

199 When directly comparing BM-SSCs with P-SSCs, we find that these cell populations are  
200 a similar population of cells. In our analysis, we found that  $CD51^+$  BMSCs had several  
201 differentially expressed genes compared to  $MxI^+Ocn^-$  P-SSCs (Fig. 2I), but there were few  
202 differences when comparing  $MxI^+Nes^+$  BM-SSCs with  $MxI^+Ocn^-$  P-SSCs and none were  
203 significant at the  $p < 0.05$  acceptance criteria (Fig. 2J). This is further summarized in the cluster  
204 plot, which demonstrated that  $MxI^+Nes^+$  BM-SSCs and  $MxI^+Ocn^-$  P-SSCs clustered together  
205 and were separate from  $CD51^+$  BM-SSCs ( $p < 0.05$ , Fig. 2K).

### 206 **Determination of differentially expressed genes between P-SSCs and BM-SSCs with** 207 **controls**

208 Considering that there were no differentially expressed genes found between  $MxI^+Ocn^-$   
209 P-SSCs and  $MxI^+Nes^+$  BM-SSCs, we proceeded to identify the genes that were differentially  
210 expressed between each of these populations and controls separately. Cluster analysis of  
211 differentially expressed genes between  $MxI^+Ocn^-$  and controls is shown in Fig. 3A and between  
212  $MxI^+Nes^+$  BM-SSCs and controls is shown in Fig. 3B. There were 101 differentially expressed  
213 genes between  $MxI^+Ocn^-$  P-SSCs compared to controls and 84 for  $MxI^+Nes^+$  BM-SSCs; while  
214 there were 55 overlapping differentially expressed genes for both SSC populations compared to  
215 controls (Fig. 3C). Genes that were overexpressed are shown in Fig. 3D and Supplemental table  
216 1. Amongst these genes, we were interested to find increased expression of the vascular

217 endothelial growth factor receptors (VEGFR), Flt1 (VEGFR1) and KDR (VEGFR2), in the P-  
218 SSC population. Between these two genes, KDR was overexpressed in both SSC populations by  
219 the microarray analysis (Fig. 3D). The full list of differentially expressed genes is given in  
220 Supplemental table 1.

### 221 **P-SSCs are CD140a<sup>+</sup>KDR<sup>+</sup> stem/progenitor cells**

222 From our microarray analysis, we sought to further explore KDR expression in  
223 *Mxl<sup>+</sup>Ocn<sup>-</sup>* P-SSCs and *Mxl<sup>+</sup>Nes<sup>+</sup>* BM-SSCs. Notably, CD140a<sup>+</sup>KDR<sup>+</sup> cells have been found to  
224 represent early mesoderm subpopulations. We first compared our SSC populations to other  
225 publically available SSC populations using Gene Commons data (Fig. 4A). We noted that other  
226 well-studied BM-SSC markers, *Leptin receptor (Lepr)* and *Gremlin 1 (Grem 1)*, were highly  
227 expressed in *Mxl<sup>+</sup>Ocn<sup>-</sup>* P-SSCs and *Mxl<sup>+</sup>Nes<sup>+</sup>* BM-SSCs, which demonstrated the consistency  
228 of our data with other known SSC populations (Fig. 4A). By this same analysis, we found that  
229 KDR appeared to be higher expression in *Mxl<sup>+</sup>Ocn<sup>-</sup>* P-SSCs than *Mxl<sup>+</sup>Nes<sup>+</sup>* BM-SSCs, thereby  
230 supporting our microarray analysis. We next assessed KDR expression by FACS analysis (Fig.  
231 4B-C). We included P-SSCs (CD45<sup>-</sup>CD31<sup>-</sup>Ter11<sup>-</sup>CD105<sup>+</sup>CD140a<sup>+</sup>*Mxl<sup>+</sup>Ocn<sup>-</sup>*), periosteal adult  
232 osteolineage cells (CD45<sup>-</sup>CD31<sup>-</sup>Ter119<sup>-</sup>*Mxl<sup>-</sup>Ocn<sup>+</sup>*), BMSCs (CD45<sup>-</sup>CD31<sup>-</sup>Ter119<sup>-</sup>CD140a<sup>+</sup>  
233 *Nes<sup>+</sup>*), and CD45<sup>+</sup> cells. We found that P-SSCs had increased expression of CD140a and KDR  
234 with 72% of the population overexpressing these markers and this was significantly increased  
235 compared to *Nes<sup>+</sup>* BMSCs (n = 3, p < 0.0001, Fig. 4D). Thus, while our microarray analysis  
236 demonstrated increased KDR expression in both BM-SSCs and P-SSCs, we found via FACS  
237 analysis that P-SSCs have selectively high expression of KDR.

238

239

## 240 Discussion

241           Herein, we sought to assess the functional genetic differences between mouse BM-SSCs  
242 and P-SSCs. These cell populations displayed differing apparent roles in fracture repair, so we  
243 hypothesized that their differences would be borne out in genetic expression analyses. We used  
244  $MxI^+Nes^+$  cells from BM as BM-SSCs and  $MxI^+Ocn^-$  cells from periosteal tissues as P-SSCs.  
245 Using these cells, we performed a microarray analysis to compare their functional genetic  
246 differences. However, we were unable to find statistically significant difference in gene  
247 expression of these two populations. This is not unexpected considering that these both represent  
248 skeletal stem/progenitor cell populations, albeit from differing sources. On further analysis, we  
249 did find a novel marker for P-SSCs in comparison to BM-SSCs, which was KDR (aka VEGFR2,  
250 Fig. 4D). Additionally, there were other potential candidate genes upregulated in each SSC  
251 population in comparison to controls but their functional significance was unclear. Thus, while  
252 we did not find differential gene expression by clustered microarray analysis, we were able to  
253 find few unique genetic differences suggesting that these two cell populations may have subtle  
254 but critical functional differences.

255           Among the several markers previously demonstrated for SSCs, including Gremlin 1,  
256 Leptin Receptor and Nestin, we chose to isolate SSCs based on expression of  $MxI$ . Unlike other  
257 markers,  $MxI^+$  cells were shown to contribute to adult osteolineage cells by live *in vivo* imaging.  
258 This was further demonstrated here, which confirms their identity as osteolineage cells (Fig. 1A).  
259 Given  $MxI$  marker has been known to label upstream hematopoietic lineage cells, we carefully  
260 isolated  $MxI^+$  SSC populations by using SSC surface markers (CD105 and CD140a) and by  
261 negatively selecting against CD45<sup>+</sup> hematopoietic lineage cells and CD31<sup>+</sup> endothelial lineage  
262 cells as previously described. In addition we found  $MxI^+$  cells are present in both the BM and

263 periosteal tissue compartments, so we transiently label  $MxI^+$  cells to isolate BM-SSCs and P-  
264 SSCs from each compartment, respectively. For BM-SSCs,  $MxI^+$  cells were further purified by  
265 co-expression with  $Nestin^{GFP}$ . By comparison, the P-SSC population was further purified by  
266 removing  $Ocn^{GFP+}$  adult osteolineage cells from the population. Inherently, our BM-SSC  
267 population was a more highly purified population than the P-SSC population used in this study,  
268 which is important to recognize for data interpretation. Still, both of these populations were  
269 found to express *Leptin Receptor* and *Gremlin 1*, showing that these populations are comparable  
270 to previously reported SSC populations, and this also supported our microarray findings.

271 We additionally isolated  $CD51^+$  cells as another population representing BMSCs for  
272 comparison to P-SSCs. This marker along with platelet derived growth factor-alpha had  
273 previously been shown to be expressed on  $Nestin^{GFP+}$  BM-SSCs. However, in our study, we  
274 found that this population was far different from the  $MxI^+Nes^{GFP+}$  BM-SSC population (Fig. 2G).  
275 In comparison,  $MxI^+Nes^+$  BM-SSCs and  $MxI^+Ocn^-$  P-SSCs were more closely related than  
276  $CD51^+$  cells were than with either of these cell populations. This finding suggests that  $CD51^+$   
277 cells may represent a distinct population cells than other BM-SSCs.

278 From our analysis, we identified KDR as a selectively expressed gene for P-SSCs  
279 compared to BM-SSCs. KDR is also known as VEGF receptor 2 (VEGFR2) and exerts its  
280 actions via binding VEGF. This receptor is known to be widely expressed on  $CD31^+$  endothelial  
281 cells. To minimize a potential endothelial contaminant in our cell isolation of P-SSCs, we had  
282 eliminated  $CD31^+$  cells during our collection making this less likely. Of note, it has been shown  
283 that human periosteal derived progenitor cells (PDPCs) display many characteristics of bone  
284 marrow MSCs and express VEGF receptor (Flt1 and KDR/Flk1) proteins [21]. Although the  
285 KDR expression in endogenous human PDPCs is not yet determined because they used *in vitro*

286 cultured periosteal cells, our data showed that FACS-isolated murine P-SSCs have selective  
287 expression of KDR on their surface, supporting the possibility of KDR as a selective marker for  
288 P-SSCs and the relevance of our gene expression analysis. As a verification step, we performed  
289 pooled microarray analysis using gene commons data and also performed FACS analysis on our  
290 cells (Fig. 4). Both of these analyses confirmed significant upregulation of KDR on  $MxI^+Ocn^-$  P-  
291 SSCs compared to BM-SSCs (Fig. 4B & D). With this in mind, the expression of KDR on  
292  $MxI^+Ocn^-$  P-SSCs is interesting because P-SSCs are believed to rapidly react to bone injuries  
293 and it would represent an efficient control mechanism for both endothelial cells and P-SSCs to  
294 respond to the same signaling molecule. Thus, during states of injury or inflammation, both cells  
295 would become activated in part for an angiogenic process and in part to initiate bone repair  
296 process, which inherently go hand-in-hand. Of further note is that periosteal tissue is known to  
297 be highly vascularized, and angiogenesis likely proceeds from the periosteal tissue. In either  
298 case, we would hope to further explore KDR as a potential regulatory mechanism of P-SSCs.

299 In summary, we performed a microarray analysis on mouse  $MxI^+Nes^+$  BM-SSCs and  
300  $MxI^+Ocn^-$  P-SSCs and found that these are a similar population of cells without apparent  
301 differences readily assessed by gene expression analysis. However, our scatter plot analysis did  
302 show potential differences in gene expression although it did not reach statistical significance.  
303 The inability to find differential gene expression may be related to the residual heterogeneity of  
304 the cell populations. Still, both populations were found to express *Leptin Receptor* and *Gremlin*  
305 *1*, which is consistent with their findings as SSCs and also supported the microarray analysis. We  
306 also found an interesting uniquely expressed gene in P-SSC, which was KDR. While the  
307 significance of this is yet to be determined, it represents an interesting gene because of its  
308 relationship to endothelial cells and the angiogenic response and the fact that periosteum is a

309 highly vascularized tissue. Other studies to explore would be single cell analysis or exploring the  
310 possibility of environmental cues as the basis for the different functional roles between BM-  
311 SSCs and P-SSCs.

312

### 313 **Acknowledgments**

314 Research reported in this publication was supported by National Institute of Arthritis and  
315 Musculoskeletal and Skin Diseases of the National Institutes of Health under grant number  
316 1K01AR061434 and by the Bone Disease Program of Texas Award to D.P and The Caroline  
317 Wiess Law Fund Award to D.P.

318

### 319 **Reference**

- 320 1. Einhorn TA, Gerstenfeld LC (2015) Fracture healing: mechanisms and interventions. *Nat Rev*  
321 *Rheumatol* 11: 45-54.
- 322 2. Schindeler A, McDonald MM, Bokko P, Little DG (2008) Bone remodeling during fracture repair: The  
323 cellular picture. *Semin Cell Dev Biol* 19: 459-466.
- 324 3. Hadjiargyrou M, O'Keefe RJ (2014) The convergence of fracture repair and stem cells: interplay of  
325 genes, aging, environmental factors and disease. *J Bone Miner Res* 29: 2307-2322.
- 326 4. Bianco P, Robey PG (2015) Skeletal stem cells. *Development* 142: 1023-1027.
- 327 5. Ozaki A, Tsunoda M, Kinoshita S, Saura R (2000) Role of fracture hematoma and periosteum during  
328 fracture healing in rats: interaction of fracture hematoma and the periosteum in the initial step of  
329 the healing process. *J Orthop Sci* 5: 64-70.
- 330 6. Roberts SJ, van Gestel N, Carmeliet G, Luyten FP (2015) Uncovering the periosteum for skeletal  
331 regeneration: the stem cell that lies beneath. *Bone* 70: 10-18.
- 332 7. Murao H, Yamamoto K, Matsuda S, Akiyama H (2013) Periosteal cells are a major source of soft  
333 callus in bone fracture. *J Bone Miner Metab* 31: 390-398.

- 334 8. Colnot C (2009) Skeletal cell fate decisions within periosteum and bone marrow during bone  
335 regeneration. *J Bone Miner Res* 24: 274-282.
- 336 9. Chan CK, Seo EY, Chen JY, Lo D, McArdle A, et al. (2015) Identification and specification of the  
337 mouse skeletal stem cell. *Cell* 160: 285-298.
- 338 10. Mendez-Ferrer S, Michurina TV, Ferraro F, Mazloom AR, Macarthur BD, et al. (2010) Mesenchymal  
339 and haematopoietic stem cells form a unique bone marrow niche. *Nature* 466: 829-834.
- 340 11. Zhou BO, Yue R, Murphy MM, Peyer JG, Morrison SJ (2014) Leptin-receptor-expressing  
341 mesenchymal stromal cells represent the main source of bone formed by adult bone marrow. *Cell*  
342 *Stem Cell* 15: 154-168.
- 343 12. Worthley DL, Churchill M, Compton JT, Taylor Y, Rao M, et al. (2015) Gremlin 1 identifies a  
344 skeletal stem cell with bone, cartilage, and reticular stromal potential. *Cell* 160: 269-284.
- 345 13. Park D, Spencer JA, Koh BI, Kobayashi T, Fujisaki J, et al. (2012) Endogenous bone marrow MSCs  
346 are dynamic, fate-restricted participants in bone maintenance and regeneration. *Cell Stem Cell* 10:  
347 259-272.
- 348 14. Kuhn R, Schwenk F, Aguet M, Rajewsky K (1995) Inducible gene targeting in mice. *Science* 269:  
349 1427-1429.
- 350 15. Visnjic D, Kalajzic I, Gronowicz G, Aguila HL, Clark SH, et al. (2001) Conditional ablation of the  
351 osteoblast lineage in Col2.3deltatk transgenic mice. *J Bone Miner Res* 16: 2222-2231.
- 352 16. Park D, Spencer JA, Lin CP, Scadden DT (2014) Sequential in vivo imaging of osteogenic  
353 stem/progenitor cells during fracture repair. *J Vis Exp*.
- 354 17. Rodda SJ, McMahon AP (2006) Distinct roles for Hedgehog and canonical Wnt signaling in  
355 specification, differentiation and maintenance of osteoblast progenitors. *Development* 133: 3231-  
356 3244.
- 357 18. Pinho S, Lacombe J, Hanoun M, Mizoguchi T, Bruns I, et al. (2013) PDGFRalpha and CD51 mark  
358 human nestin+ sphere-forming mesenchymal stem cells capable of hematopoietic progenitor cell  
359 expansion. *J Exp Med* 210: 1351-1367.



- 360 19. Sacchetti B, Funari A, Michienzi S, Di Cesare S, Piersanti S, et al. (2007) Self-renewing  
361 osteoprogenitors in bone marrow sinusoids can organize a hematopoietic microenvironment. *Cell*  
362 131: 324-336.
- 363 20. Mizoguchi T, Pinho S, Ahmed J, Kunisaki Y, Hanoun M, et al. (2014) Osterix marks distinct waves  
364 of primitive and definitive stromal progenitors during bone marrow development. *Dev Cell* 29:  
365 340-349.
- 366 21. Ferretti C, Borsari V, Falconi M, Gigante A, Lazzarini R, et al. (2012) Human periosteum-derived  
367 stem cells for tissue engineering applications: the role of VEGF. *Stem Cell Rev* 8: 882-890.

368 **Figure 1**

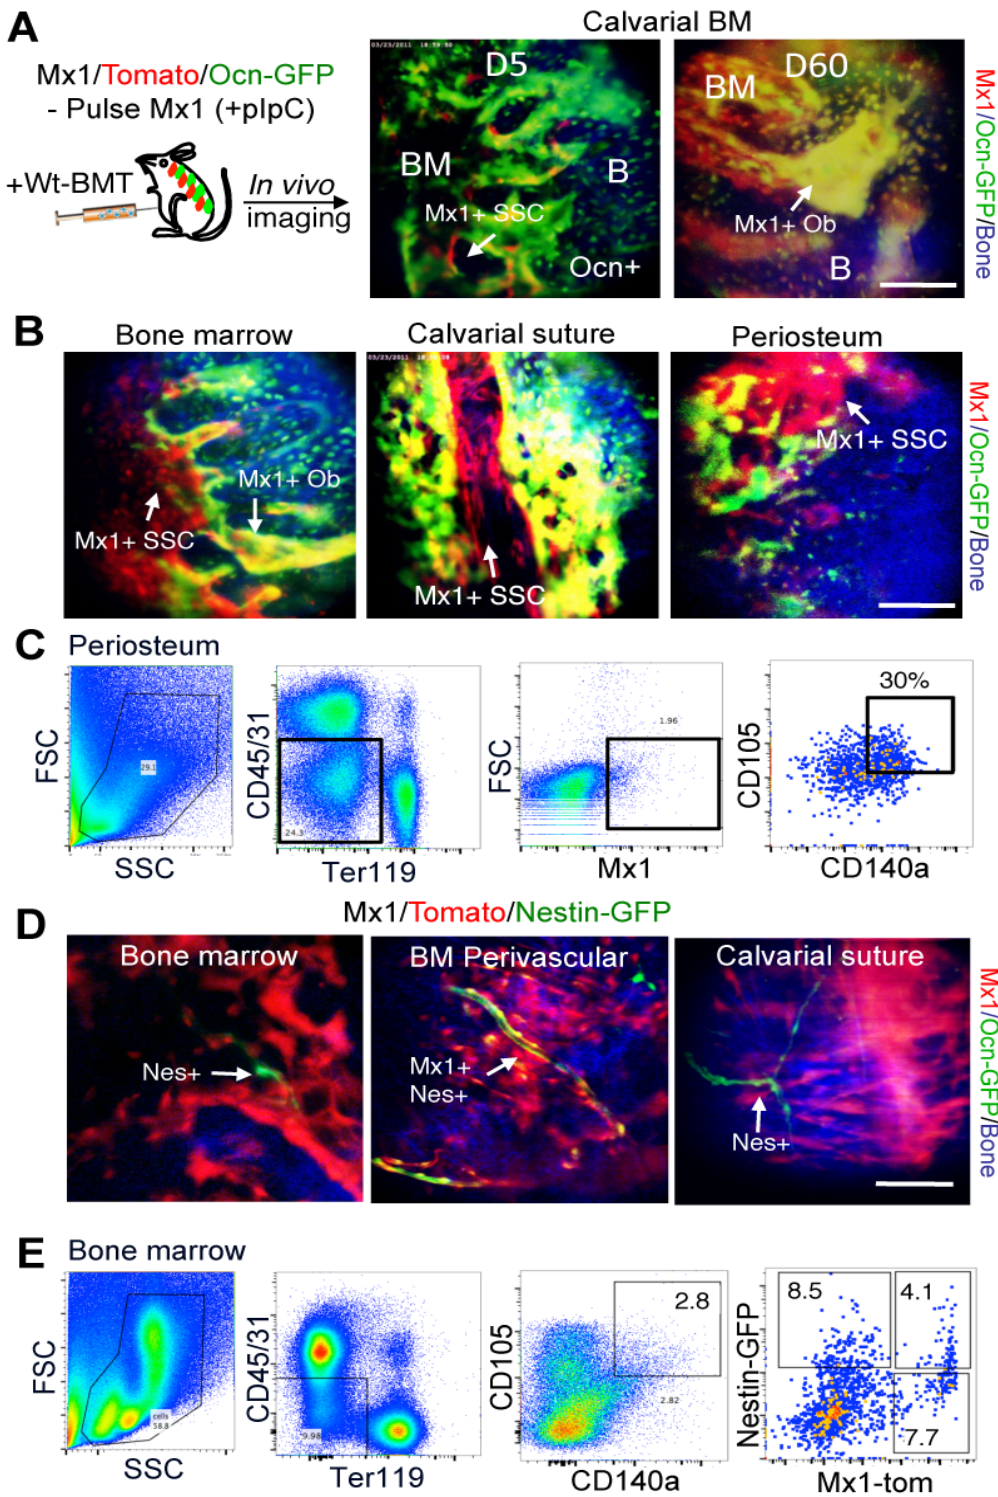

369

370

371 **Fig. 1 Functional identification of P-SSCs and BM-SSCs.** (A.) Interferon inducible *MxI*<sup>+</sup>  
372 SSCs (red) are shown to contribute to majority osteoblasts (green, overlap yellow) *in vivo*. B)  
373 *MxI*<sup>+</sup> SSCs represent long-term osteolineage progenitor cells in BM and periosteal tissues. C) P-  
374 SSCs are derived from periosteal tissues and are FACS sorted by CD45<sup>-</sup>CD31<sup>-</sup>Ter119<sup>-</sup>  
375 *MxI*<sup>+</sup>*Ocn*<sup>-</sup>CD105<sup>+</sup>CD140a<sup>+</sup>, which are referred to as *MxI*<sup>+</sup>*Ocn*<sup>-</sup> P-SSCs. D) *MxI*<sup>+</sup>*Nestin*<sup>+</sup> BM-  
376 SSCs are perivascular cells in BM but are undetectable in periosteum and calvarial suture. E)  
377 *MxI*<sup>+</sup>*Nes*<sup>+</sup> cells within CD45<sup>-</sup>CD31<sup>-</sup>Ter119<sup>-</sup>CD105<sup>+</sup>CD140a<sup>+</sup> SSC fraction in bone marrow are  
378 isolated by FACS-sorting and are referred to as *MxI*<sup>+</sup>*Nes*<sup>+</sup> BM-SSCs. Notably, CD105<sup>+</sup>CD140a<sup>+</sup>  
379 progenitors are heterogeneous *MxI*<sup>+</sup> and *Nestin*<sup>+</sup> cells.

380 **Figure 2**

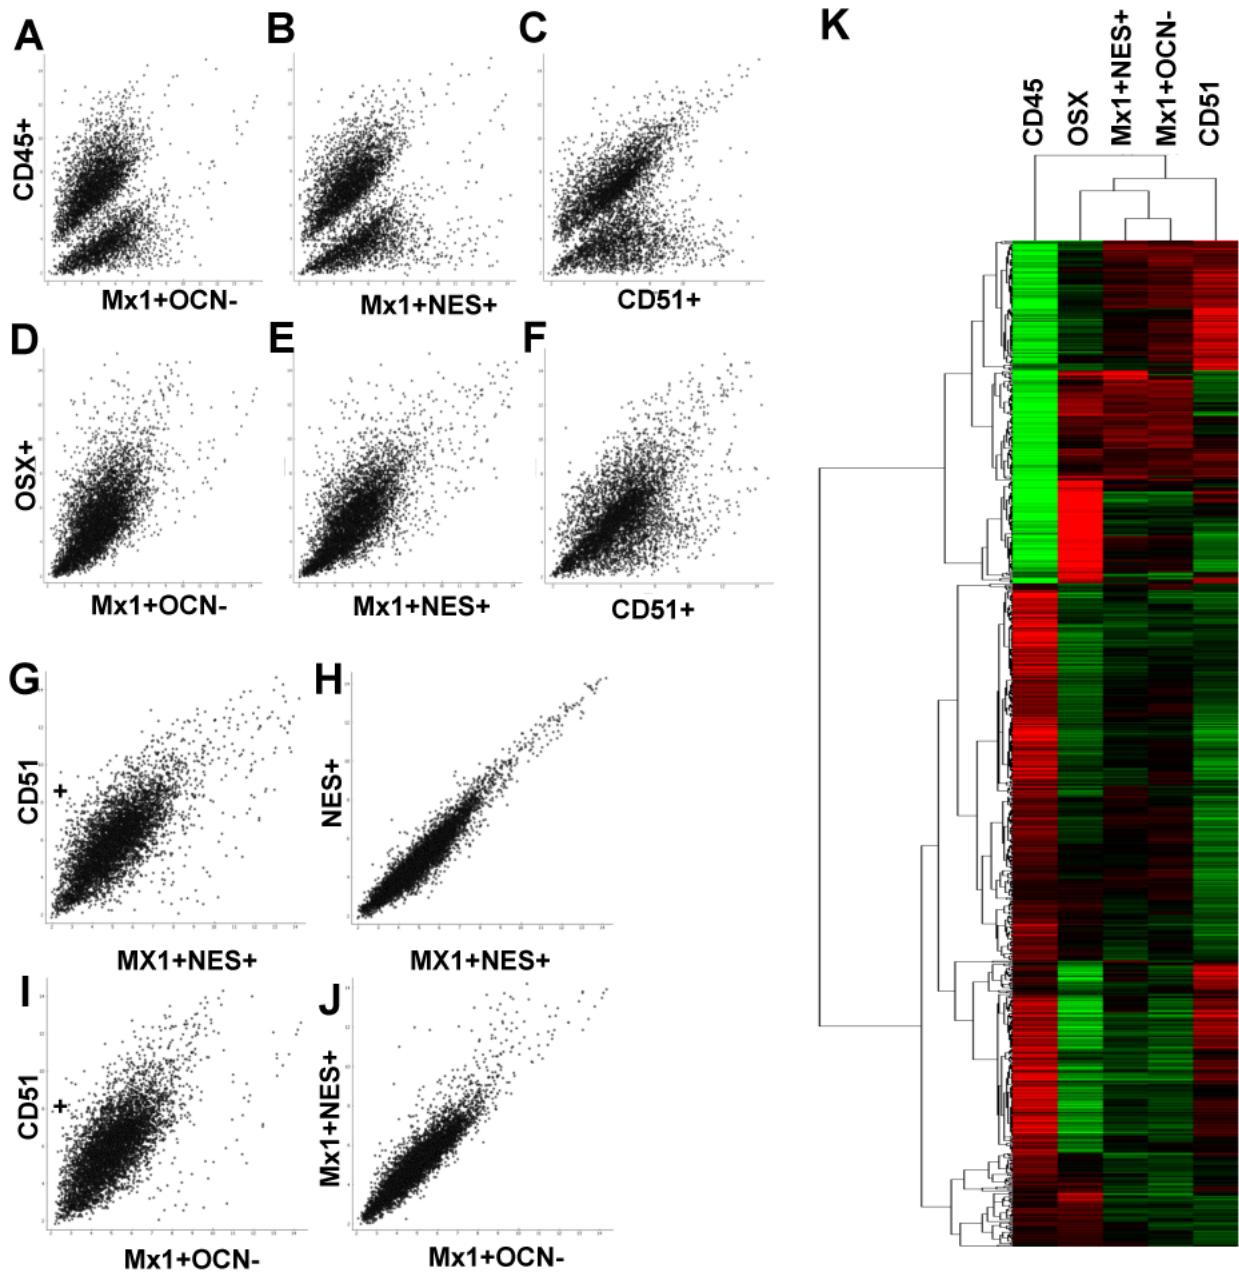

381

382

383

384

385 **Fig. 2. Commonly used markers for BM-SSCs yield a heterogeneous mixture, but are**  
386 **similar to P-SSCs.** (A-C) Scatter plot comparison between  $MxI^+Ocn^-$  P-SSCs, (A),  $MxI^+Nes^+$   
387 BM-SSCs (B), and  $CD51^+$  BMSCs (C) with  $CD45^+$  cells, demonstrates that these populations  
388 are likewise different from  $CD45^+$  cells within the BM compartment. (D-E) Scatter plot  
389 comparison between  $MxI^+Ocn^-$  P-SSCs, (D),  $MxI^+Nes^+$  BM-SSCs (E), and  $CD51^+$  BMSCs (F)  
390 with  $Osx^+$  osteolineage cells shows that each of these populations are more functionally similar  
391 to the osteolineage cells. (G) Direct comparison between  $CD51^+$  BMSCs and  $MxI^+Nes^+$  BM-  
392 SSCs demonstrates that these two commonly used selection markers for BM-SSCs yield a  
393 heterogeneous mixture of cells. (H)  $MxI^+Nes^+$  BM-SSCs and  $Nes^+$  cells are essentially the same  
394 population of cells. (I-J) Comparing  $MxI^+Ocn^-$  P-SSCs with  $CD51^+$  BMSCs (I) shows that these  
395 are functionally different cell-populations, but comparison with  $MxI^+Nes^+$  BM-SSCs (J) shows  
396 few differences. (K) Cluster analysis of these cell populations confirms scatter plot analysis and  
397 shows that  $MxI^+Ocn^-$  P-SSCs and  $MxI^+Nes^+$  BM-SSCs cluster together, but each of these  
398 populations are distinct from  $CD51^+$  BM-SSCs ( $p < 0.05$ ).

399 **Figure 3.**

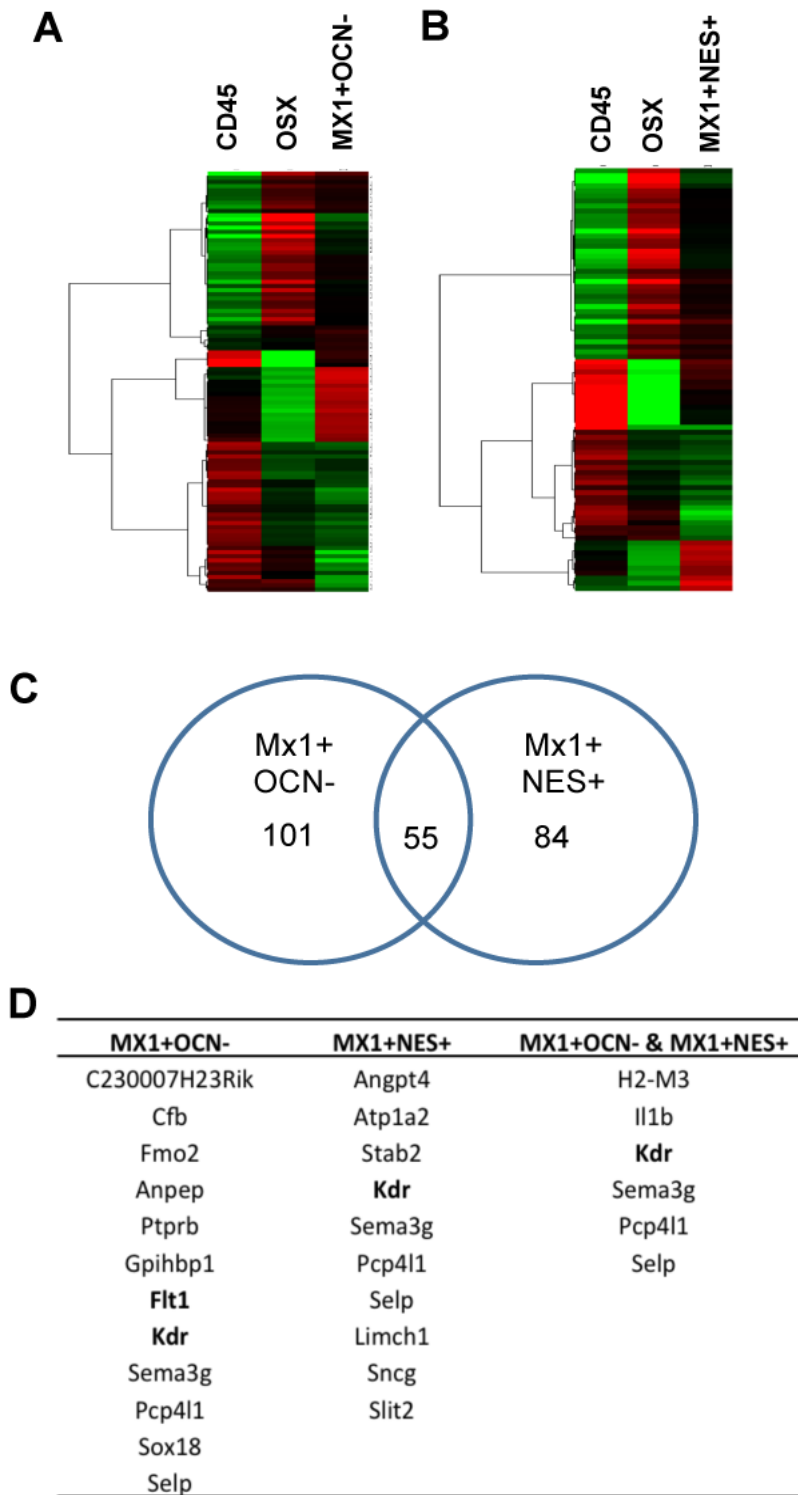

400

401

402 **Fig. 3. Identification of differentially expressed gene analysis between P-SSCs and BM-**  
403 **SSCs and controls.** Differential gene expression between  $CD45^+$  cells and  $Osx^+$  cells with (A)  
404  $Mxl^+Ocn^-$  P-SSCs and (B)  $Mxl^+Nes^+$  BM-SSCs. (C) Number of differentially expressed genes  
405 between SSC populations and controls shows 101 for  $Mxl^+Ocn^-$  P-SSCs, 84 for  $Mxl^+Nes^+$  BM-  
406 SSCs, and 55 overlap genes. (D) Table of genes that were upregulated in SSCs compared to  
407 controls shows some interesting vascular endothelial growth factor receptors (VEGF), including  
408 Flt1 (VEGF receptor 1) and KDR (VEGF receptor 2), despite removal of CD31 and Ter119  
409 endothelial lineage cells from these populations.

410 **Figure 4.**

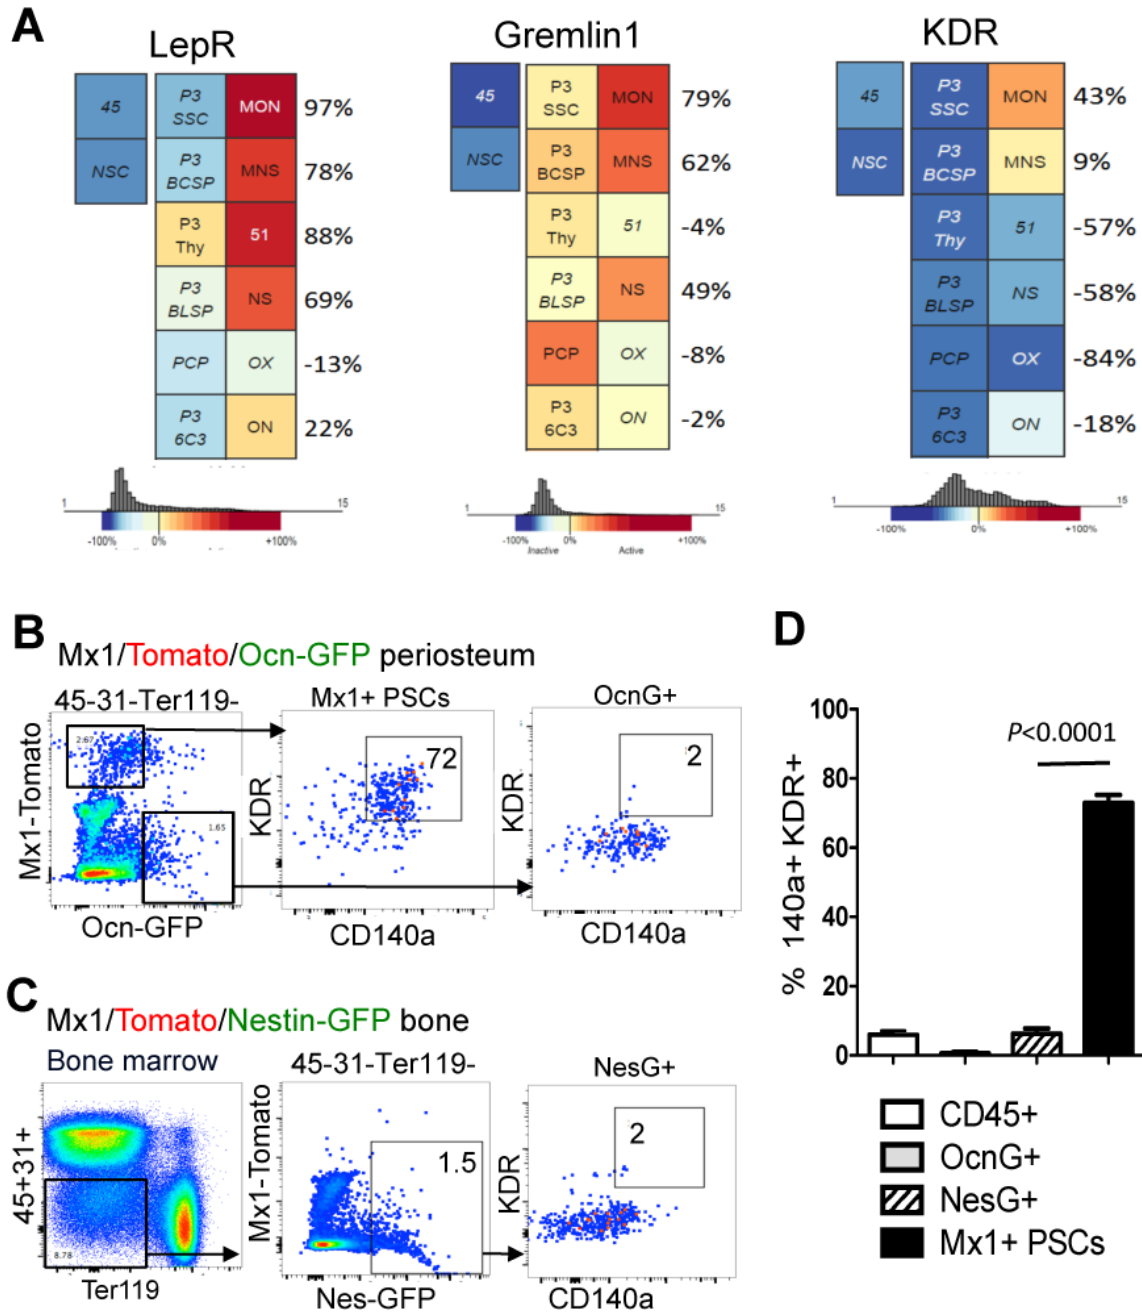

411

412

413



414 **Fig. 4. P-SSCs are KDR<sup>+</sup>CD140a<sup>+</sup> osteolineage progenitor cells.** (A) Gene commons analysis  
415 demonstrates that *Mxl<sup>+</sup>Ocn<sup>-</sup>* P-SSCs (*MON*) and *Mxl<sup>+</sup>Nes<sup>+</sup>* P-SSCs (*MNS*) highly express  
416 *Leptin receptor (Lepr)* and *Gremlin 1 (Grem 1)* further demonstrating that these SSC populations  
417 share characteristics with previously studied BM-SSC populations. Further, KDR is found to be  
418 uniquely expressed in P-SSCs compared to other SSCs. (B) KDR<sup>+</sup>CD140a<sup>+</sup> FACS analysis of P-  
419 SSCs (CD45<sup>-</sup>CD31<sup>-</sup>Ter119<sup>-</sup> *Mxl<sup>+</sup>Ocn<sup>-</sup>*) and periosteal derived controls (CD45<sup>-</sup>CD31<sup>-</sup>Ter119<sup>-</sup>  
420 *Mxl<sup>-</sup>Ocn<sup>+</sup>*) (C) KDR<sup>+</sup>CD140a<sup>+</sup> FACS analysis of BM-SSCs (CD45<sup>-</sup>CD31<sup>-</sup>Ter119<sup>-</sup>*Mxl<sup>-</sup>Nes<sup>+</sup>*)  
421 and BM derived CD45<sup>+</sup> controls. (D) Summary of FACS analysis demonstrates that *Mxl<sup>+</sup>Ocn<sup>-</sup>*  
422 P-SSCs uniquely express KDR<sup>+</sup>CD140a<sup>+</sup> (72%) compared to BM-SSCs and control populations  
423 (n = 3, p < 0.0001).

424 **Supporting Information**

| MX1+OCN-      |                      | MX1+NES+      |               | MX1+OCN- & MX1+NES+ |               |
|---------------|----------------------|---------------|---------------|---------------------|---------------|
| Col9a1        | 1700019D03Rik        | Fzd9          | <b>Angpt4</b> | Galnt18             | <b>H2-M3</b>  |
| 3110079O15Rik | Robo4                | Galnt18       | <b>Atp1a2</b> | Col9a1              | <b>Il1b</b>   |
| Steap1        | <b>C230007H23Rik</b> | Col2a1        | <b>Stab2</b>  | Chadl               | <b>Kdr</b>    |
| Chadl         | <b>Cfb</b>           | Col9a1        | <b>Kdr</b>    | Epyc                | <b>Sema3g</b> |
| Epyc          | <b>Fmo2</b>          | Chadl         | <b>Sema3g</b> | Ncmap               | <b>Pcp4l1</b> |
| Ncmap         | <b>Anpep</b>         | Epyc          | <b>Pcp4l1</b> | Fgfr3               | <b>Selp</b>   |
| Acan          | <b>Ptprb</b>         | Ncmap         | <b>Selp</b>   | Acan                | Gcnt1         |
| Fgfr3         | <b>Gpihbp1</b>       | Fxyd2         | <b>Limch1</b> | P3h2                | Hint3         |
| Lmcd1         | <b>Flt1</b>          | BC022687      | <b>Sncg</b>   | Lmcd1               | D11Wsu47e     |
| P3h2          | <b>Kdr</b>           | Acan          | <b>Slit2</b>  | Meltf               | Slc39a11      |
| Meltf         | <b>Sema3g</b>        | Fgfr3         | Clec4d        | Trpv4               | 0610007P14Rik |
| Trpv4         | <b>Pcp4l1</b>        | P3h2          | Gatm          | Il17d               | Tmem51        |
| Alpl          | <b>Sox18</b>         | Lmcd1         | Clec4e        | Mum11               | Tnfrsf21      |
| Me1           | <b>Selp</b>          | Meltf         | Il1b          | Mest                | Perp          |
| Mum11         | Naalad2              | Trpv4         | H2-M3         | Arsi                | Orai1         |
| Il17d         | Cbwd1                | Arsi          | Btla          | Fgfr1               | Pank1         |
| Slc8a3        | Gcnt1                | Has2          | Ifitm6        | Has2                | Pdk1          |
| Moxd1         | Hint3                | Fgfr1         | Arhgap45      | Alpl                | Mcoln2        |
| Chst1         | D11Wsu47e            | 3632451O06Rik | Padi4         | Lpar4               | Smim5         |
| Arsi          | Galk1                | Car8          | Fpr2          | Car8                | F5            |
| Has2          | Psph                 | Ddit4l        | Mmp8          | Rarres1             | Stard4        |
| Fgfr1         | Slc39a11             | Wnt5b         | Fcgr3         | Me1                 | Scarb1        |
| 3632451O06Rik | Rpl14                | Colgalt2      | Wfdc17        | Slc8a3              | Stk26         |
| Car8          | 0610007P14Rik        | Zcchc5        | Gcnt1         | 3632451O06Rik       | Sh3bp2        |
| Ddit4l        | Perp                 | Eps8l2        | Hint3         | Ddit4l              |               |
| Wnt5b         | Tmem51               | Rarres1       | D11Wsu47e     | Colgalt2            |               |
| Colgalt2      | Foxred1              | Lpar4         | Slc39a11      | Zcchc5              |               |
| Zcchc5        | Mlec                 | Alpl          | 0610007P14Rik | Rpl39l              |               |
| Panx3         | Pank1                | Il17d         | Tnfrsf21      | Susd5               |               |
| Gm22          | Sgk3                 | Me1           | Perp          | Wnt4                |               |
| Lpar4         | Orai1                | Mum11         | Tmem51        | Wnt5b               |               |
| Rarres1       | Pdk1                 | Slc8a3        | Cd300lb       |                     |               |
| Rpl39l        | Tnfrsf21             | Dner          | Orai1         |                     |               |
| Susd5         | Naa38                | Mest          | Vav3          |                     |               |
| Wnt4          | 2310039H08Rik        | 9230110C19Rik | Pank1         |                     |               |
| Mest          | Hmgcr                | Rpl39l        | Gabpb1        |                     |               |
| Shisa4        | Pex12                | Susd5         | Slc14a1       |                     |               |
| Fosl1         | Vkorc111             | Wnt4          | Pdk1          |                     |               |
| Adamts3       | Usmg5                | C130050O18Rik |               |                     |               |
| Galnt18       | F5                   | Sh3bp2        |               |                     |               |
| Mras          | Mcoln2               | F5            |               |                     |               |
| Spa17         | Sh3bp2               | Smim5         |               |                     |               |
| Scube2        | Smim5                | Scarb1        |               |                     |               |
| Arap3         | Msmo1                | Stk26         |               |                     |               |
| H2-M3         | Lym4                 | Mcoln2        |               |                     |               |
| Il1b          | Scd1                 | Stard4        |               |                     |               |
| Naip2         | Scarb1               |               |               |                     |               |
| C1qtnf9       | Stk26                |               |               |                     |               |
| Bdh2          | Idi1                 |               |               |                     |               |
| Clic5         | Rras2                |               |               |                     |               |
|               | Stard4               |               |               |                     |               |

425

426 **Supplemental Table 1** – All differentially expressed genes comparing P-SSCs and BM-SSCs

427 with both *CD45*<sup>+</sup> cells and *OSX*<sup>+</sup> cells (p < 0.05)

| P-value   | MX1+OCN- vs CD51 | MX1+NES+ vs CD51 |
|-----------|------------------|------------------|
| p < 0.001 | 0                | 0                |
| p < 0.01  | 90               | 97               |
| p < 0.05  | 410              | 430              |
| p < 0.1   | 888              | 731              |

428

429 **Supplemental Table 2** – Table showing number significantly different genes and p-values.
